# Supplementary material for: Coronary Angiography Characteristics of Symptomatic Patients with Prior Coronary Artery Bypass Graft: A Descriptive Study
Source: Hindawi journal article supplement (doi:10.1155/2019/1832128), 2019-11-11
Supplement: f1 [file 1832128.f1.pdf]

**Supplemental Table 1** CAG characteristics and progression of native coronary arteries before CABG and at the time of re-hospitalization.

| Variables          | MT<br>n=351 | PCI<br>n=642 | P value |
|--------------------|-------------|--------------|---------|
| Before CABG        |             |              |         |
| Diseased vessels   |             |              | 0.672   |
| One vessel         | 26(7.4%)    | 52(8.1%)     | 0.811   |
| LAD                | 20(76.9%)   | 43(82.7%)    |         |
| LCX                | 3(11.5%)    | 5(9.6%)      |         |
| RCA                | 3(11.5%)    | 4(7.7%)      |         |
| Two vessels        | 121(34.5%)  | 204(31.8%)   | 0.753   |
| LAD+LCX            | 43(35.5%)   | 70(34.3%)    |         |
| LAD+RCA            | 70(57.9%)   | 112(54.9%)   |         |
| LCX+RCA            | 8(6.6%)     | 22(10.8%)    |         |
| Three vessels      | 204(58.1%)  | 386(60.1%)   | NS      |
| LAD+LCX+RCA        | 204(100.0%) | 386(100.0%)  |         |
| Re-hospitalization |             |              |         |
| Diseased vessels   |             |              | 0.589   |
| One vessel         | 9(2.6%)     | 15(2.3%)     | 0.824   |
| LAD                | 7(77.8%)    | 10(66.7%)    |         |
| LCX                | 1(11.1%)    | 3(20.0%)     |         |
| RCA                | 1(11.1%)    | 2(13.3%)     |         |
| Two vessels        | 102(29.1%)  | 168(26.2%)   | 0.499   |
| LAD+LCX            | 36(35.3%)   | 66(39.3%)    |         |
| LAD+RCA            | 50(49.0%)   | 70(41.7%)    |         |

|               |             |             |    |
|---------------|-------------|-------------|----|
| LCX+RCA       | 16(15.7%)   | 32(19.0%)   |    |
| Three vessels | 240(68.4%)  | 459(71.5%)  | NS |
| LAD+LCX+RCA   | 240(100.0%) | 459(100.0%) |    |

---

CABG=coronary artery bypass graft; CAG= Coronary angiography; LAD=left anterior descending artery; LCX=left anterior descending artery; MT= medical therapy; NS=not state; RCA=right coronary artery.

**Supplemental Table 2** PCI procedural characteristics of symptomatic patients with prior CABG(n=642)

| Variable                          | Patients   |
|-----------------------------------|------------|
| Target vessel                     |            |
| Target NCA only                   | 552(86.0%) |
| Target NCA &graft                 | 36(5.6%)   |
| Target graft only                 | 54(8.4%)   |
| Patients with ACS                 | 381        |
| Target vessel                     |            |
| Target NCA only                   | 322(84.5%) |
| Target NCA &graft                 | 24(6.3%)   |
| Target graft only                 | 35(9.2%)   |
| Target graft                      | 59(15.5%)  |
| Patients with occluded vein graft | 13 (22.0%) |
| Number of occluded vein grafts    | 17         |

ACS= Acute coronary syndrome; CABG=coronary artery bypass graft; CTO=chronic total occlusion; PCI=percutaneous coronary intervention.
